## Reporting to the Convention on Biology Diversity: How are countries assessing and protecting their genetic diversity?

- Sean Hoban<sup>1</sup>, Catriona D. Campbell<sup>2</sup>, Jessica da Silva<sup>3a,3b</sup>, Robert Ekblom<sup>4</sup>, W. Chris Funk<sup>5\*^</sup>,  
5 Brittany A. Garner<sup>6</sup>, José A. Godoy<sup>7</sup>, Francine Kershaw<sup>8</sup>, Anna J. MacDonald<sup>2,9\*^</sup>, Joachim  
Mergeay<sup>10a,10b\*^</sup>, Melissa Minter<sup>11</sup>, David O'Brien<sup>12</sup>, Ivan Paz Vinas<sup>13a,13b</sup>, Sarah K. Pearson<sup>14</sup>,  
Sílvia Pérez-Espona<sup>15a,15b</sup>, Kevin M. Potter<sup>16</sup>, Isa-Rita M. Russo<sup>17\*</sup>, Gernot Segelbacher<sup>18</sup>,  
Cristiano Vernesi<sup>19</sup>, Margaret E. Hunter<sup>20\*^</sup>
- 10 <sup>1</sup>Center for Tree Science, The Morton Arboretum, 4100 Illinois Rt 53, Lisle, USA, 60532,  
[shoban@mortonarb.org](mailto:shoban@mortonarb.org), 001 630 719 2419  
<sup>2</sup> Institute for Applied Ecology, University of Canberra, Canberra, ACT 2601, Australia,  
[cat.campbell@canberra.edu.au](mailto:cat.campbell@canberra.edu.au), ORCID: 0000-0001-7983-1832  
<sup>3a</sup>Biodiversity Research, Assessment and Monitoring Division, South African National  
15 Biodiversity Institute, Kirstenbosch Research Centre, Rhodes Drive, Private Bag X7 7735, Cape  
Town, South Africa, [j.dasilva@sanbi.org.za](mailto:j.dasilva@sanbi.org.za), +27-21-799-8860, ORCID: 0000-0001-8385-1166  
<sup>3b</sup>Centre for Ecological Genomics and Wildlife, University of Johannesburg, PO Box 524,  
Auckland  
Park 2006, South Africa  
20 <sup>4</sup> Department of Ecology and Genetics, Uppsala University, Uppsala, SE-75236, Sweden,  
[robert.ekblom@ebc.uu.se](mailto:robert.ekblom@ebc.uu.se), +46 18 471 6468, ORCID: 0000-0003-2222-1966  
<sup>5</sup> Department of Biology, Graduate Degree Program in Ecology, Colorado State University, 1878  
Campus Delivery, Fort Collins, CO 80523-1878, USA, [Chris.Funk@colostate.edu](mailto:Chris.Funk@colostate.edu), ORCID:  
0000-0002-6466-3618  
25 <sup>6</sup> Interdisciplinary Degree Program, The University of Montana, 32 Campus Dr., Missoula, MT,  
59812, [brittany.garner@umontana.edu](mailto:brittany.garner@umontana.edu), ORCID: 0000-0002-8122-5636  
<sup>7</sup> Department of Integrative Ecology, Estación Biológica de Doñana (CSIC), Seville, E-41092,  
Spain, [godoy@ebd.csic.es](mailto:godoy@ebd.csic.es), +34 954466781, ORCID: 0000-0001-7502-9471  
8 Natural Resources Defense Council, 40 West 20th Street, New York, NY, USA, 10011,  
30 [fkershaw@nrdc.org](mailto:fkershaw@nrdc.org), +1 917 450 0994  
<sup>9</sup> The John Curtin School of Medical Research / Research School of Biology, The Australian  
National University, Acton, ACT 2601, Australia, [anna.macdonald@anu.edu.au](mailto:anna.macdonald@anu.edu.au), ORCID: 0000-  
0003-2972-200X  
<sup>10a</sup> Research Institute for Nature and Forest, Havenlaan 88, 1000 Brussels,  
35 [joachim.mergeay@inbo.be](mailto:joachim.mergeay@inbo.be)  
<sup>10b</sup> Aquatic Ecology, Evolution and Conservation, KULeuven, Charles Deberiotstraat 32, box  
2439, 3000 Leuven Box 2439. +32499942942. [Joachim.mergeay@inbo.be](mailto:Joachim.mergeay@inbo.be) Orcid: 0000-0002-  
6504-0551  
11 Leverhulme Centre for Anthropocene Biodiversity, Department of Biology, University of York,  
40 Wentworth Way, York, YO10 5DD, United Kingdom [mm1874@york.ac.uk](mailto:mm1874@york.ac.uk) ORCID: 0000-0003-  
1580-7176  
12 Scottish Natural Heritage, Great Glen House, Leachkin Road, Inverness, IV3 8NW, UK  
[david.obrien@nature.scot](mailto:david.obrien@nature.scot) ORCID: 0000-0001-7901-295X  
<sup>13a</sup> Laboratoire Ecologie Fonctionnelle et Environnement, Université de Toulouse, UPS, CNRS,

- 45 INP, UMR-5245 ECOLAB, 118 route de Narbonne, Toulouse, France 31062, [ivanpaz23@gmail.com](mailto:ivanpaz23@gmail.com); +33 534323946, ORCID ID: 0000-0002-0043-9289  
<sup>13b</sup> Laboratoire Evolution & Diversité Biologique, CNRS, IRD, UPS, UMR-5174 EDB, 118 route de Narbonne, Toulouse, France 31062.  
<sup>14</sup>College of Science and Engineering, Flinders University of South Australia, GPO Box 2100,  
50 Adelaide, South Australia, 5001, Australia, [sarahkimpearson@gmail.com](mailto:sarahkimpearson@gmail.com) , +61 444 529 061, ORCID: 0000-0002-6895-7832  
<sup>15a</sup> Royal (Dick) School of Veterinary Studies, The University of Edinburgh, Easter Bush Campus, Roslin, Midlothian, EH25 9RG, Scotland, United Kingdom, [silvia.perez-espona@ed.ac.uk](mailto:silvia.perez-espona@ed.ac.uk), ORCID [0000-0001-7098-4904](https://orcid.org/0000-0001-7098-4904)  
55 <sup>15b</sup> The Roslin Institute, The University of Edinburgh, Easter Bush Campus, Roslin, Midlothian, EH25 9RG, Scotland, United Kingdom, [silvia.perez-espona@ed.ac.uk](mailto:silvia.perez-espona@ed.ac.uk), ORCID [0000-0001-7098-4904](https://orcid.org/0000-0001-7098-4904)  
<sup>16</sup> Department of Forestry and Environmental Resources, North Carolina State University, 3041 Cornwallis Rd., Research Triangle Park, NC 27709, USA, [kpotter@ncsu.edu](mailto:kpotter@ncsu.edu), ORCID ID: 0000-  
60 0002-7330-5345  
<sup>17</sup> Cardiff School of Biosciences, Sir Martin Evans Building, Cardiff University, Museum Avenue, Cardiff, CF10 3AX, United Kingdom, [russoim@cardiff.ac.uk](mailto:russoim@cardiff.ac.uk), +44 29 2087 6036, ORCID ID: 0000-0001-9504-3633  
<sup>18</sup> Chair of Wildlife Ecology and Management, University Freiburg, Tennenbacher Str. 4, D-  
65 79106 Freiburg, [genot.segelbacher@wildlife.uni-freiburg.de](mailto:genot.segelbacher@wildlife.uni-freiburg.de) ORCID: [0000-0002-8024-7008](https://orcid.org/0000-0002-8024-7008)  
<sup>19</sup> Forest Ecology and Biogeochemical Cycles Unit, Research and Innovation Centre-Fondazione Edmund Mach, San Michele all'Adige 38010 (TN), Italy, [cristiano.vernesi@fmach.it](mailto:cristiano.vernesi@fmach.it), +39 331 6471339, ORCID 0000-0001-7534-5669  
<sup>20</sup>U.S. Geological Survey, Wetland and Aquatic Research Center, 7920 NW 71st St, Gainesville,  
70 FL, 32653, USA [mhunter@usgs.gov](mailto:mhunter@usgs.gov), 001 352 264 3484, ORCID: 0000-0002-4760-9302  
  
\* Conservation Genetics Specialist Group, International Union for Conservation of Nature (IUCN), 1196 Gland, Switzerland  
75 ^ Group on Earth Observation Biodiversity Observation Network

## Abstract

Genetic diversity is critically important for all species- domesticated and wild- to adapt to environmental change, and for ecosystem resilience to extreme events. Nonetheless,  
80 assessment and monitoring of genetic diversity are often overlooked, and there are large knowledge and policy gaps regarding genetic biodiversity conservation. International agreements such as the Convention on Biological Diversity (CBD) have committed to conserve, and sustainably and equitably use, all levels of biodiversity- genes, species and ecosystems- in all parts of the planet. In this study, we present, to our knowledge, the first thorough assessment  
85 of consideration of genetic diversity by Parties to the CBD. We conducted a detailed, systematic analysis of a large representative sample of CBD 5th (submitted 2014) and 6th (submitted 2018) National Reports to quantitatively assess each country's actions, progress, values and indicators related to genetic diversity. The results highlighted that although the importance of

90 genetic diversity is recognised by most Parties to the CBD, and that recognition has increased  
over time, genetic targets mainly concerned genetic diversity within cultivated plants, farm  
animals, and crop wild relatives, with little focus on other wild species. Actions for conserving  
genetic diversity were primarily ex-situ facilities, as well as policy, rather than monitoring and  
intervention for maintaining genetic diversity in situ. The most commonly used indicators of  
95 genetic diversity status were the number of genetic resources in conservation facilities, number  
of threatened breeds and Red List Index, which are not well correlated to genetic erosion in  
most species- meaning that genetic change is not well monitored by currently used indicators.  
Analyses of genetic data observations, indigenous use and knowledge of genetic diversity, and  
strategies being developed and implemented to conserve genetic diversity are highly under-  
reported. Based on these findings we make several recommendations for the post-2020 CBD  
100 Biodiversity Framework, to facilitate improved awareness, assessment and monitoring, and  
consistent and complete reporting of progress, of genetic diversity in future National Reports.

## 105 Introduction

The biodiversity crisis is increasingly urgent as human activities threaten life-supporting  
ecosystems and natural resources (Galli et al. 2014). In response, most countries have signed  
on to international accords, such as the Convention on Biological Diversity (CBD), committing to  
taking action and regularly reporting on progress towards protecting biodiversity. Although  
110 biodiversity includes diversity of ecosystems, species and genes, the loss of genetic diversity  
(genetic and trait differences among individuals and populations within a species) has been  
relatively underappreciated for decades in both policy and practice, despite its importance  
(Vernesi et al. 2008, Laikre 2010, Laikre et al. 2010, Holderegger et al. 2019). Genetic diversity  
provides wild species with the potential to adapt to environmental change (Wernberg et al.  
115 2018), reduces negative inbreeding effects, supports ecosystem structure, integrity and  
resilience (Lotze et al. 2011), and is the basis for species diversity. It provides society with a  
range of improvement options for plant and animal breeding to improve agriculture (Bhandari et  
al. 2017), forestry (Potter et al. 2017), fisheries (Houston et al. 2020) and other biodiversity-  
dependent industries, and forms the foundation for all other levels of variation (Hughes et al.  
120 2008). Maintaining genetic diversity in domesticated species (e.g. breeds, landraces, and  
varieties) allows for cultivation/breeding under different environmental conditions and pressures  
such as pests and disease, which impact productivity (Hoffmann 2010).

Recent analyses show that genetic diversity has declined over the past century (Leigh et al.  
125 2019), that genetically distinct populations are being lost, and that remaining genetic diversity is  
not well safeguarded *in situ* or *ex situ* (Khoury et al. 2019). Major drivers of genetic diversity loss  
include climate change, habitat fragmentation and destruction, and overharvest (resulting in  
small population sizes). In spite of this, biodiversity assessments and reports tend to focus on  
species-level diversity; within-species genetic variation assessments are limited due to  
130 perceived costs and lack of training and standard protocols. However, there are some examples  
of genetic diversity in biodiversity assessments (Hoban et al 2020; Santamaria and Mendez  
2012).

135 The CBD was first put into force in 1992 following the Rio de Janeiro Earth Summit and is the  
premier instrument for guiding and measuring global biodiversity conservation, sustainable  
development, and equity. The CBD's signatory Parties committed to conserving all levels of  
biodiversity via 21 targets to be achieved by 2010 (CBD 2004), and a new set of 20 targets by  
2020 (CBD 2010a). However, the wording of targets emphasized genetic diversity primarily for  
140 species of direct human use, especially agricultural ones. The 2010 genetic Target 3 focused on  
genetic diversity of "crops, livestock, and harvested species of trees, fish and wildlife and other  
valuable species" and the 2020 Target 13 focused on genetic diversity of "cultivated plants and  
farmed and domesticated animals and wild relatives, including other socio-economically and  
culturally valuable species" (CBD 2004; CBD 2010a). Other commitments such as the Global  
Strategy for Plant Conservation (GSPC) and UN Sustainable Development Goals (SDG) are  
145 also primarily related to genetic diversity within agricultural species. The focus of the targets  
likely influences how countries monitor, manage, and report on genetic diversity. Although  
genetic diversity is critical to agricultural innovations, resilience and food security, a primary  
focus on domesticated species could also result in genetic erosion in other species (semi-  
managed and wild species, including wild relatives of domesticated species) and consequent  
150 losses in a range of ecosystem services (Hoban et al 2020). The ongoing post-2020 planning by  
the CBD will set new goals, targets and indicators for 2030 and 2050; recent drafts of this  
framework still reflect lack of emphasis, ambition and clarity on genetic diversity conservation  
(Hoban et al. 2020).

155 National Reports were developed in 1995 to assess progress in the implementation of the CBD.  
Since 2000, signatory Parties have been required to submit National Reports every four years to  
report on their progress towards the CBD targets and on any related national targets that are  
implemented. These reports assist the Conference of Parties to consider the lessons learned  
during implementation of the Convention, identify gaps in capacity and analysis at different  
160 levels (national, regional, and global), and formulate appropriate requests and guidance to  
signatory Parties and other related bodies. Each reporting period has a particular set of  
guidelines e.g. the guidance differs slightly for each reporting period (see Methods and  
Discussion). Reports are typically compiled by government agencies, such as a Ministry of the  
Environment, and other relevant stakeholders (CBD website - <https://www.cbd.int/reports/>). In  
165 addition to progress towards CBD and national targets, the reports summarize the status of all  
levels of biodiversity, threats, advances in sustainable development, and inclusion of indigenous  
and local communities. Because of their periodic nature, global scope, and common template  
and guidelines for preparing the document, analyses of National Reports can help evaluate  
global progress in biodiversity conservation. Previously, National Reports have been analysed  
170 to assess: progress towards the implementation of the CBD targets (CBD 2014; Birdlife et al.  
2016); national challenges in meeting CBD goals (Chandra & Idrisova 2011); indicators and  
knowledge gaps towards their use to achieve CBD targets (Bhatt et al 2019); women and  
gender equality (IUCN GGO 2016; GmbH 2018); success on the implementation of the GSPC  
(Paton & Lughada 2011); and progress towards protected area management effectiveness  
175 targets (Woodley et al. 2012; Coad et al. 2013). Most recently, 5<sup>th</sup> National Reports were  
critically assessed to evaluate the status of the natural world and actions needed to conserve

biodiversity and ecosystem services (IPBES 2019).

180 The consideration of genetic diversity, genetic approaches, or progress towards genetic  
diversity targets in National Reports has not yet been systematically analyzed. In fact, genetic  
diversity has been noted as one of the principal data gaps to assessing biodiversity progress  
(OECD 2019). In previous analyses of National Reports, genetic diversity was mentioned  
185 primarily in the context of conservation of genetic diversity of agricultural species for global food  
security (IPBES 2019; CBD 2014). Reference to the importance of conservation of genetic  
diversity of wild species, without a link to agricultural species, is rare (see CBD Secretariat  
2007; OECD 2019). In the context of Aichi Target 16 (benefits and sharing of genetic resources),  
data gaps to monitor genetic diversity were also mentioned (Aguilar-Støen & Dhillion 2003). The  
scant analysis of genetic diversity in these reports may be due to challenges in using genetic  
190 information for measuring CBD target progress (Chandra & Idrisova 2011), and lack of metrics  
for monitoring genetic diversity (Bubb et al. 2011; Walpole et al. 2009; OECD 2019).

In this context, we systematically assessed the consideration of genetic diversity in a large  
representative sample of 5<sup>th</sup> and 6<sup>th</sup> CBD National Reports from 2014 and 2018, to gain a better  
understanding of how countries are assessing genetic diversity and its protection in agricultural  
195 and natural ecosystems. This analysis contributes to a general understanding of how genetic  
diversity is considered in global biodiversity assessments, following numerous calls to increase  
such consideration (Shafer et al. 2015; Taylor et al. 2017; Hoban et al. 2020; Laikre et al. 2020).  
It also provides a basis for suggesting improvements to future reporting on genetic diversity. Our  
specific aims were to analyze 5<sup>th</sup> and 6<sup>th</sup> National Reports to:

- 200 ● Assess targets pertaining to genetic diversity, and which indicators (i.e., measures used  
to present a high level summary) are used to assess status (present state) and trends  
(change) in biodiversity
- Quantify the reporting of genetic diversity actions (e.g., management interventions,  
policy, funding, capacity building, training), threats (e.g., concerns or drivers of change  
205 such as habitat fragmentation), and values (e.g., utility or benefits)
- Quantify the frequency with which different types of species are mentioned in reference  
to genetic diversity
- Determine whether the variables we assess change across time (as genetic diversity  
data has become more affordable and is recognized as more important) and across  
210 socio-economic categories (due to funds available).

## Methods

We reviewed 57 5<sup>th</sup> National Reports (NR) and 57 6<sup>th</sup> NR (9 in Spanish, 10 in French, and 38 in  
215 English) available prior to 1 July 2019 (see [Supplemental Document A](#), Questionnaire  
Development) obtained from the CBD Clearinghouse (<https://chm.cbd.int/>). We evaluated  
reports using a structured questionnaire composed of standardized questions (hereafter  
“questionnaire”) developed over several review phases of both the protocol and the  
questionnaire in 2019. We devised the set of questions based on the CBD instructions to  
220 Parties on how to prepare their reports (<https://www.cbd.int/reports/>). We limited our questions

to thematic sections that were common between the 5<sup>th</sup> and 6<sup>th</sup> NRs (CBD 2010b, 2014). The list of questions and an explanation of how each question matches the CBD instructions is in the [Supplemental Document B](#). Every question had a corresponding detailed set of instructions to help with consistent interpretation and completion of the questionnaire among reviewers.

225

The final questionnaire had 13 questions for each report. In this manuscript, we focus on 9 of these questions (Table 1), leaving the remainder to investigate in future manuscripts. This questionnaire was filled out by a set of experts (the authors of this manuscript) in population genetics and applied conservation genetics (hereafter “reviewers”), following a protocol similar to Pierson et al. (2016), Bhatt et al. (2019), and Chandra and Idrisova (2011). Each reviewer evaluated six to eight reports split between 5<sup>th</sup> and 6<sup>th</sup> NRs (with no reviewer evaluating both 5<sup>th</sup> and 6<sup>th</sup> reports from a single country). We allocated reports to reviewers to ensure that each had reports from multiple continents and differing levels of economic income (according to the IMF: see Nielsen 2011). In addition to reading the report “cover to cover,” the reviewers also performed a keyword search, querying the document for 15 pre-determined genetic diversity-related keywords (in the relevant report language, see [Supplemental Document A](#)). After reading, highlighting and taking notes on each report, the reviewer completed the questionnaire (via a Google Form and then compiled in a .csv file).

230

235

| Question from questionnaire                                                                                                                                                                                   | Notes                                                                                                                                                                                                                                                                                                             |
|---------------------------------------------------------------------------------------------------------------------------------------------------------------------------------------------------------------|-------------------------------------------------------------------------------------------------------------------------------------------------------------------------------------------------------------------------------------------------------------------------------------------------------------------|
| Is genetic diversity (e.g., genetic threats, genetics-related policy or gene conservation actions, essentially any genetic content) mentioned in the executive summary?                                       | Reviewers chose from multiple categories representing genetic diversity (e.g., agrobiodiversity, population genetics, biotechnology)                                                                                                                                                                              |
| Is the importance or utility of genetic diversity noted, and if yes, how?                                                                                                                                     | Eleven categories and an “other” response were provided; reviewers could select as many as applicable                                                                                                                                                                                                             |
| Is there a national-level target focused on “conserving/ maintaining genetic diversity,” “genetic erosion,” “genetic resources,” “genetic loss,” etc. (e.g., a national target similar to Aichi Target 13)?   | Reviewers answered Yes or No; if Yes, they were asked to determine if the target applied to agricultural, socio-economically important, or all species                                                                                                                                                            |
| Is there a different national-level target that REFERS to “genetic diversity,” “genetic erosion,” “genetic resources,” “genetic loss,” or other genetics related terms or genetic data?                       | Reviewers were asked if genetic diversity is mentioned under Target 16* (access and benefits) or any other targets (and to specify which one)                                                                                                                                                                     |
| What is the degree of progress reported regarding Aichi Target 13, or if Aichi progress is not reported, then progress on the national target corresponding to the Aichi Target 13, if one can be identified? | Reviewers selected one of 6 categories of progress; these categories were defined in Instructions to the 6 <sup>th</sup> National Report, but not in the 5 <sup>th</sup> National Report; thus, for the 5 <sup>th</sup> National Report, reviewers were asked to select the closest applicable degree of progress |

|                                                                                                                                                                       |                                                                                                                                                                                                                                                                                                                           |
|-----------------------------------------------------------------------------------------------------------------------------------------------------------------------|---------------------------------------------------------------------------------------------------------------------------------------------------------------------------------------------------------------------------------------------------------------------------------------------------------------------------|
| Is the STATUS** of genetic diversity reported on? Is the TREND of genetic diversity reported on?                                                                      | Fifteen indicators (including eight previously recommended by the CBD) and an “other” response were provided for both status and trends; reviewers could select as many as applicable and categorized each as “qualitative” or “quantitative”; trends were also categorized as “increasing”, “decreasing”, or “no change” |
| Are there actions planned regarding genetic diversity or actions taken regarding genetic diversity, in or by this country?                                            | Eleven categories of action and an “other” response were provided; reviewers could select as many as applicable and categorized each as “general” or “specific”                                                                                                                                                           |
| What genetic threats/ pressures/ drivers are reported- according to the report authors (potential or actual, measured or not)?                                        | Eleven categories of threats and an “other” response were provided; reviewers could select as many as applicable                                                                                                                                                                                                          |
| The reviewer should identify any mention of species, genera, or species groups that can be placed in one of the categories below, in the context of genetic diversity | For each mention of a species, the reviewer recorded the category (e.g., domesticated animal, species of concern, forestry, culturally important, etc.) and categorized the mention as relating to actions, status, threat, trend, or other                                                                               |

240 Table 1: The questions that reviewers answered for this study.

\*Aichi Target 16 calls on countries to enact legislation implementing the Nagoya Protocol on Access to Genetic Resources and the Fair and Equitable Sharing of Benefits Arising from their Utilization

245 \*\*Status refers to a single time point while trend refers to either a change, or status at two time points, from which a change can be inferred.

We made a strong effort to standardize the review approach and to provide precise instructions and examples for reviewers. However, we acknowledge that each reviewer has a unique background, training, and expertise and there could be room for some level of interpretation in reviewing National Reports. To maximize standardization of questionnaire completion, we had several scoping phases to check agreement among reviewers and discussed disagreements as a group. Additionally, 15 reports (eight for 6<sup>th</sup> NR and seven for 5<sup>th</sup> NR) were reviewed independently by two reviewers to ensure consistency in interpretation (see [Supplemental Document A](#), Agreement Among Reviewers).

255

All data were analyzed in R v3.6.3. To analyse the questionnaire responses, we first tabulated the number of reports with each potential answer. We compared the *proportion* of responses for each question between the 5<sup>th</sup> and 6<sup>th</sup> NRs using Fisher’s exact tests (for example, we determined whether the proportions in each category of indicators, e.g. the relative length of each bar in Figure 1, differed between the reports). We also compared the mean *number* of responses recorded between the 5<sup>th</sup> and 6<sup>th</sup> NRs (for example the number of times that indicators were identified, the sum of the lengths of bars in Figure 1) using paired t-tests when data met the conditions of normality and Wilcoxon tests when not. Responses from low, medium, and high income countries (according to the IMF) were also compared; significance

260

265 was tested for 5<sup>th</sup> and 6<sup>th</sup> NRs separately and pooled together.

## Results

270 Throughout the results section, differences between 5<sup>th</sup> and 6<sup>th</sup> National Reports (NR) are only reported if statistically significantly different. Briefly, no contingency tests for comparing whether the categories changed between the 5<sup>th</sup> and 6<sup>th</sup> NRs were significant (i.e., no temporal change in proportion of responses in each answer category). The t-tests for the number of responses are noted if significant. All  $p$  values (significant and not significant) are reported in [Supplemental Document A](#), Table S2.

275

**Genetic diversity in executive summary.** A majority (82%) of countries contained an executive summary for the 5<sup>th</sup> NR. Of these, 60% mentioned genetic keywords relating to agrobiodiversity (e.g., gene banks, breeds, or varieties); 40% mentioned genetic studies, gene conservation actions, or genetic processes; and 34% mentioned biotechnology or access to and benefit sharing of genetic resources.

280

**Values of genetic diversity.** The most frequently noted values of genetic diversity included resilience to environmental or climate change (37% 5NR, 30% 6NR), increasing productivity in agriculture/ forestry/ fisheries (37% 5NR, 30% 6NR), developing new varieties in these sectors (26% 5NR, 25% 6NR), and adaptation to environmental change (26% 5NR, 23% 6NR, see [Supplemental Document A](#) Table S4). There were 34% more mentions of values of genetic diversity in the 5<sup>th</sup> NR compared to the 6<sup>th</sup> NR ( $p=0.04$ ).

285

**Genetic diversity targets wording and progress.** Of the 57 countries reviewed, 70% and 79% referred to a national-level genetic diversity target in the 5<sup>th</sup> and 6<sup>th</sup> NRs, respectively. Many NRs (47% 5NR, 69% 6NR) mentioned other socio-economically important (e.g., not only agricultural) species relating to this genetic diversity target, while a smaller percentage included wording that could refer to species that do not have economic importance (21% 5NR, 38% 6NR). For target progress, the most commonly reported progress was “Some progress but insufficient” (57% 5NR, 44% 6NR), followed by “on track to achieve” (30% 5NR, 38% 6NR). Most countries also mentioned genetic diversity under Aichi Target 16, which regards access to and benefit-sharing of genetic resources (56% 5NR, 60% 6NR).

290

295

**Genetic diversity in other targets.** This question assessed the extent to which countries identify genetic diversity as a concern, tool, or opportunity in association with any target other than Targets 13 and 16 (topics such as human well-being, protected areas, education, science capacity, and mainstreaming biodiversity). The number of countries with references to genetics, associated with at least one Aichi target other than Targets 13 and 16, increased over time (19% 5NR, 49% 6NR), a significant increase of more than 2.5 times ( $p=0.001$ ). In addition, the number of targets for which at least one country included a genetics-related reference increased over time. Genetics was mentioned at least once under 13 different ‘other’ Aichi targets in the 5<sup>th</sup> NR, but under 19 ‘other’ targets in the 6<sup>th</sup> NR, a significant increase ( $p=0.044$ ) of almost 50%.

300

305



310 Several targets are of note. In the 6th NR, 16% of countries mentioned genetics in relation to  
both Targets 12 and 18, and 19% mentioned genetics for Target 19. Target 12 focuses on the  
prevention of threatened species extinction, 18 on the preservation and application of traditional  
knowledge relevant to conserving and sustainable use of biodiversity, and 19 on the  
improvement and application of knowledge relating to the value, functioning, and status of  
biodiversity. Only Target 8 (controlling pollution) had no reference to genetics by any country.  
315

**Indicators used for genetic diversity status and trends.** The most commonly mentioned  
indicators of status were the number of genetic resources in conservation facilities (Fig. 1, and  
[Supplemental Document A](#), Table S7), the number of plant genetic resources known/surveyed,  
and the Red List status. Note that these indicators are loosely, or not at all, connected to genetic  
diversity change. Meanwhile, the state of preservation of indigenous/local knowledge of genetic  
diversity was rarely reported, as were metrics from analysis of DNA/genetic markers.  
320

Trends were mentioned half as often as status, and showed a mix of increasing, decreasing,  
and no change. A strong trend was only seen for “the genetic resources secured *ex situ*” which  
325 were typically reported as increasing ( [Supplemental Document A](#), Table S8)

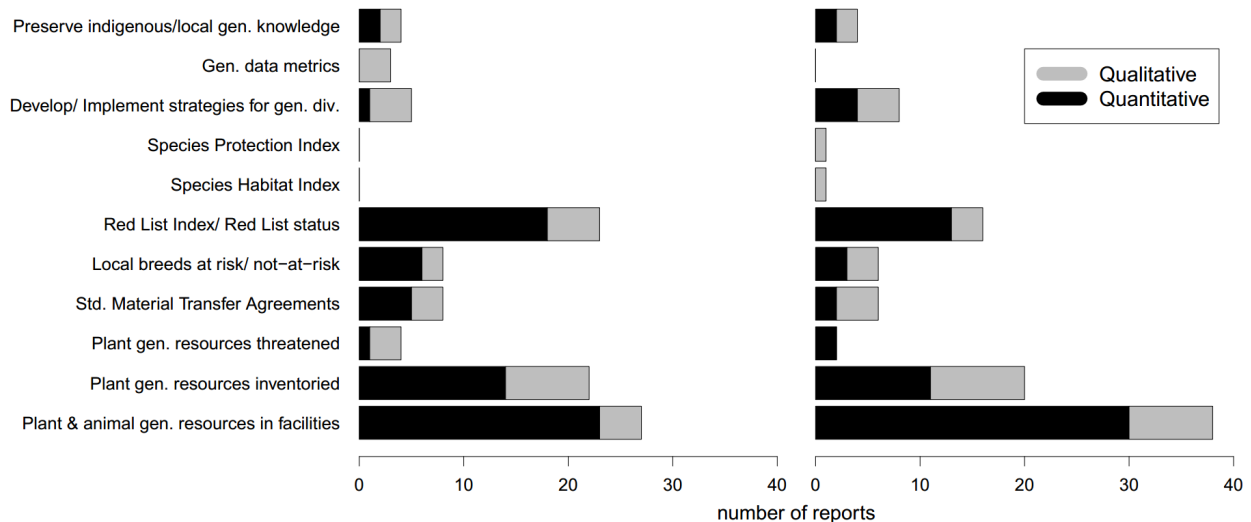

330 Figure 1: Number of 5th (left) and 6th (right) National Reports (NR) that include each indicator of  
genetic status with a Quantitative (numeric, such as a percentage) or Qualitative (descriptive,  
such as “high” or “low”) value.

**Actions.** The most common genetic diversity actions (Fig. 2) were establishing seed banks,  
research agencies or breeding programs, and laws or policies. Single time point genetic studies  
335 and genetic monitoring were rare.

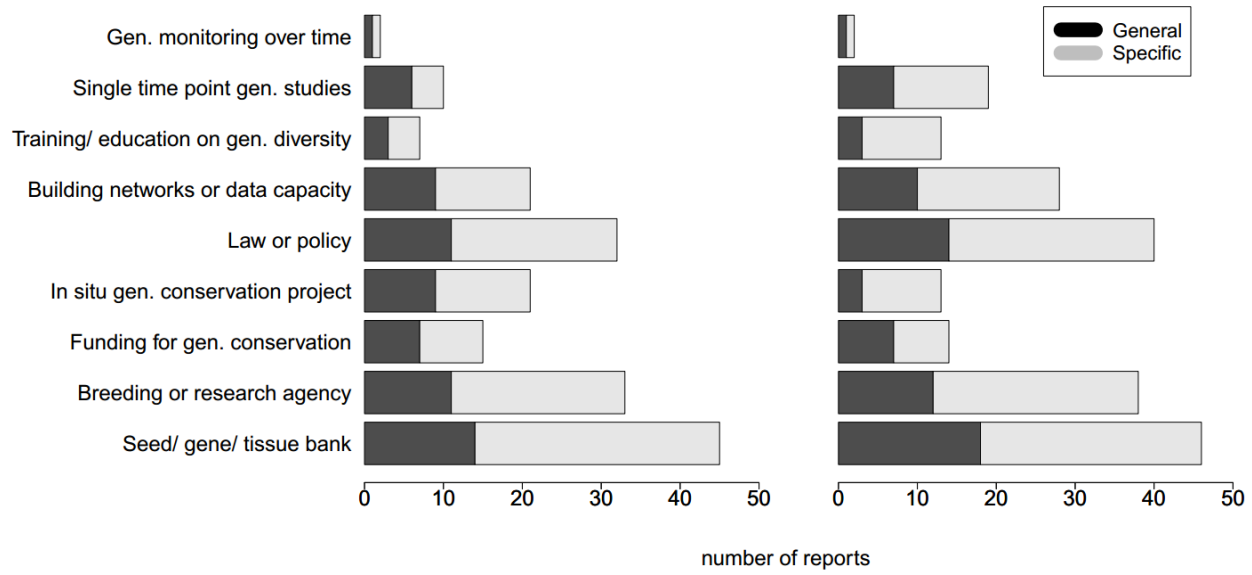

Figure 2: Number of 5th (left) and 6th (right) National Reports that report each type of genetic diversity action with General (e.g. non-specific action, black) or Specific (grey) information.

340

**Threats.** National Reports documented a variety of recognized threats to genetic diversity. The most common threats in the NRs were replacement of native varieties or breeds, habitat fragmentation, and climate or environmental change ([Supplemental Document A](#), Table S9). Other typical conservation genetic concerns were also mentioned, including decrease in range size, overharvest, pests or other invasive species, small population problems, genetic modification, and hybridization. A higher number of threats were identified in the 5<sup>th</sup> NR than the 6<sup>th</sup> NR ( $p=0.02$ ).

345

350

**Species mentioned.** The top three species types (Fig. 3 and [Supplemental Document A](#), Table S11) mentioned were cultivated crops and farm animals (both >20% in both reports). These were followed closely by crop wild relatives, forestry species, and species of conservation concern (all >9% in both reports). There were few references to “other socio-economically important species” such as wild-harvested plant and animal species, species providing ecosystem services, and culturally valuable species (each <5% in both reports). There were few mentions of wild relatives of domesticated animals (4% both reports). Species were most frequently acknowledged in relation to “actions,” followed by mentions relating to “threat” or “status” of genetic diversity. References of species with respect to “change” in genetic diversity were rare.

355

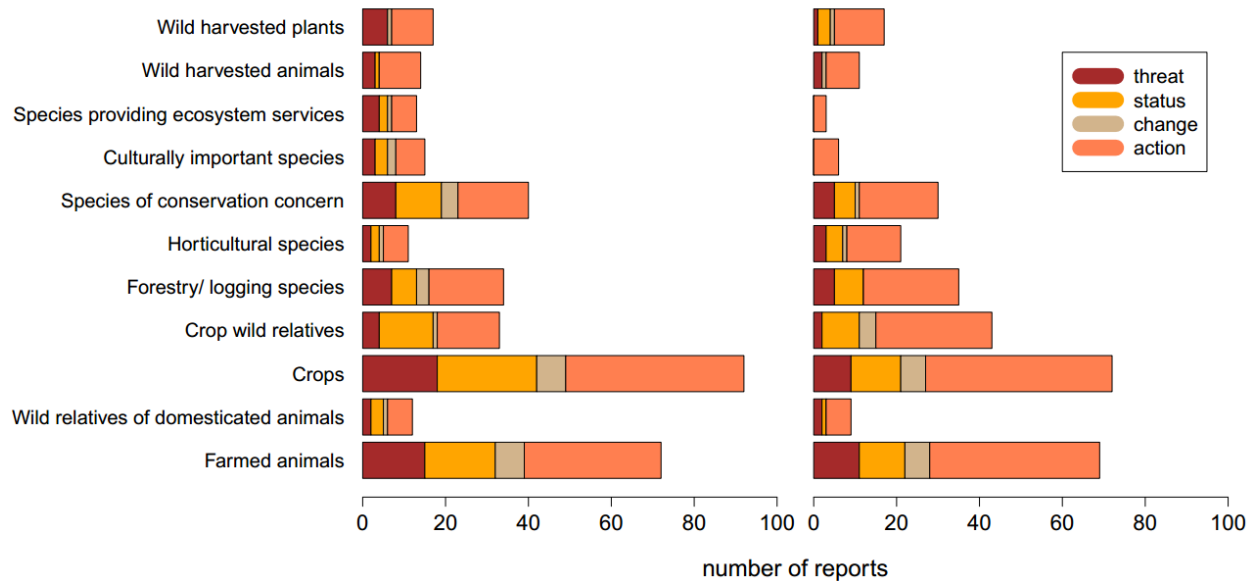

360

Figure 3: Number of mentions (x-axis) of each species type (y-axis) in four different contexts (whether the mention of the species' genetic diversity related to a threat, status, change, or action) for each report.

365

**Differences related to income levels of countries.** Differences in countries' responses according to their income level were tested for all questions. Differences were only observed in three areas: mentions of genetic diversity in relation to targets other than Aichi Targets 13 and 16, threats, and species types.

370

Low-income and middle-income countries were more likely than high-income countries to mention genetics in relation to genetic diversity targets, genetic resources targets, and in targets other than Aichi Targets 13 and 16, though none of these results were significant (see Supplemental Document A, Socioeconomic status).

375

There were no significant differences among income level categories in the number of mentions of threats, but there were significant differences in the proportion of categories of threat. Specifically, middle- and low-income countries' NRs had fewer mentions of small population size and habitat fragmentation as threats to genetic diversity, but more mentions of replacement of traditional varieties as a threat (significant only when 5<sup>th</sup> and 6<sup>th</sup> NRs are pooled,  $p=0.04$ ).

380

As for species type, middle- and low-income countries had fewer mentions of species of conservation concern and species providing ecosystem services in their NRs, but had more mentions of horticultural species, compared to high income countries (only marginally significant when 5<sup>th</sup> and 6<sup>th</sup> NRs are pooled,  $p=0.08$ ).

385

## Discussion

390 Genetic diversity provides species with adaptive potential, and contributes to the resilience and  
functioning of ecosystems (Prieto et al. 2015; Raffard et al. 2019). The need to maintain genetic  
diversity to counter current global crises (climate, biodiversity loss, hunger) is well established  
(e.g. Di Falco & Perrings 2003; Spielman et al. 2004; Frankham 2005; Ehlers et al. 2008;  
Casadebaig et al. 2014; Sjöqvist & Kremp 2016). If countries are to design effective targets and  
395 interventions for this goal, they need to adequately report on genetic diversity. CBD National  
Reports are an essential information source, and reveal how countries value, monitor, and  
manage biodiversity (CBD 2000). For both the 5th and 6th CBD reports we found that most  
countries did mention the importance of genetic diversity. However, where status and actions  
relating to genetic diversity were reported, they primarily referred to agricultural species, and  
400 used indicators that are not well connected to genetic diversity status or change. There were  
also only minor differences in findings for the 5th vs. 6th Report, reflecting consistency over  
time. Below, we discuss the findings and how they point to improved future National Reports  
and genetic diversity Targets, indicators and capacity.

#### 405 **Genetic diversity Targets**

Encouragingly, most countries have sufficient awareness of genetic diversity to include it in the  
Executive Summary and to have a genetic diversity National Target. Numerous benefits of  
genetic diversity were recognised, including maintaining ecosystem stability or services, food  
production, and pest/disease resistance. National Targets largely, but not always, focused on  
410 agricultural species, which aligns with how Aichi Targets 13 and 16 approach genetic diversity.  
The high (and increasing over time) number of reports linking genetic diversity to Target 12  
(prevention of species' extinctions) may reflect increasing recognition of genetic diversity's role  
in supporting species survival (Booy et al. 2000; Frankham 2010; Sgrò et al. 2011). Meanwhile,  
references to genetic diversity in Targets 18 (recognition, respect and integration of "traditional  
415 knowledge, innovations and practices of indigenous and local communities") and 19 (improving  
and sharing scientific knowledge relating to biodiversity and its "values, functioning, status and  
trends, and the consequences of its loss") may reflect increasing recognition of the importance  
of indigenous and scientific knowledge of genetic diversity and/or genetic resources (Talaat et  
al. 2012).

420 Low- and middle-income countries were more likely than high-income countries to discuss  
genetic diversity in relation to targets other than Aichi Targets 13 and 16. This may reflect higher  
relative interest in knowledge transfer and greater recognition of traditional ecological  
knowledge by these countries (FAO 2009). Nonetheless, the importance of genetic diversity and  
425 the use of genetic tools are still rarely mentioned. We emphasize a need for increased  
knowledge of, capacity development, and access to genetic data for practical use  
(Recommendations 1 and 2 below). Scientists must ensure that assessments of genetic  
diversity should be effectively communicated to managers and policy makers (Pérez-Espona  
and ConGRESS 2017, Lundmark et al. 2019). It is also incumbent upon policy makers (in CBD  
430 and beyond) to explicitly state that genetic diversity is important for multiple targets in its  
reporting guidance, as recently mentioned for sustainable fisheries in the CBD draft monitoring  
framework (REF) ([Recommendation 7](#)).

### Genetic diversity indicators

435 The number of genetic resources in conservation facilities, the number of plant genetic  
resources known/surveyed, and the Red List were commonly-mentioned indicators of the status  
of genetic diversity. These indicators are recommended by the CBD (CBD 2010c), but their  
prevalence probably also reflects data availability in existing national and international  
440 databases. The first two indicators also likely reflect Aichi Target 13's emphasis on agricultural  
species, and the importance of genetic resources for national food security (Esquinas-Alcázar  
2005; Khoury et al. 2014). Despite their status as official genetic CBD indicators, they don't  
directly assess genetic diversity and are at best loosely connected to genetic change Hoban et  
al. (2020). Our reviews also highlight the need for consistent and appropriate terminology  
relating to genetic biodiversity (Recommendation 6). For example, the term "genetic resources"  
445 merely reflects that the material contains hereditary information (DNA) and can be propagated,  
but does not always pertain to within-species genetic diversity- sometimes it refers to species  
diversity. This and other terms are often used by reporting countries as a substitute for true  
genetic diversity monitoring.

450 Only 5% of countries referenced DNA-based studies (e.g. genetic statistics) or recorded  
indigenous and local knowledge of genetic diversity. This is likely because there are no official  
CBD indicators based on genetic markers or indigenous knowledge of genetic biodiversity (CBD  
2010c). Further, Indicator uptake and reporting depend on availability of data on baselines and  
trends, as well as capacity (resources, technical expertise, and management) (Bubb 2013;  
455 Vanhove et al. 2017). Similarly, only 13% of countries reported measures to develop or  
implement strategies for minimizing genetic erosion, even though Target 13 calls for such  
strategies. One limiting factor may be that there is no available database on, or guidance on  
how to develop and apply, such strategies. Anecdotal reports of indigenous and local knowledge  
of genetic diversity occur in several reports (e.g. Antigua & Barbuda: "local communities are  
460 considered to be the first line of defence and will report instances of removing genetic diversity";  
Myanmar: "hotspots of crop wild relatives identified through farmers"), suggesting that indicators  
are needed on this topic (Recommendation 3).

Our analysis follows previous assessments of the use of genetics in national and international  
465 conservation policy and reporting, including in species action plans, biodiversity legislation, etc.  
(Laikre 2010; Pierson et al. 2016). While genetic diversity often has relatively straightforward  
applications to management, it is more difficult to assess and report on genetic diversity change  
for policy (OECD 2019, SCB 2020), and consequently pragmatic substitutes for genetic diversity  
are sometimes used as Indicators. For example, the Montréal Process (an international forest  
470 sustainability framework) includes three "genetic diversity" indicators that focus on: species at  
risk of losing genetic variation; population levels of forest-associated species; and the status of  
on-site and off-site gene conservation efforts (Montréal Process 2015). Similarly, the Forest  
Europe sustainable forest framework includes a genetic diversity indicator that quantifies the  
area managed for the conservation and utilization of forest tree genetic resources (Ministerial  
475 Conference on the Protection of Forests in Europe 2015). Overall, the paucity of references to  
reliable indicators of genetic diversity shows that the scientific community needs to develop

affordable, standardized indicators that clearly track genetic change (Hoban et al. 2020; Laikre et al. 2020) (Recommendation 5).

#### 480 **Genetic diversity actions**

The most common genetic diversity actions reported were *ex situ* strategies (seed banks, research agencies, breeding programs, laws, etc.). Less common, but still mentioned were *in situ* actions (developing *in situ* genetic conservation projects, single time point genetic studies). The lower frequency of these actions may reflect the same constraints on capacity, knowledge, and funding constraints previously mentioned. While *ex situ* actions, as well as laws and policies, are important to forestall the absolute loss of genetic diversity (Mastretta-Yanes et al. 2018; Hoban 2019), they cannot be relied upon exclusively, because only a limited representation of species and their genetic diversity can be maintained *ex situ* (Hoban 2019, Castañeda-Álvarez et al. 2016; Fant et al. 2016), and sustaining genetic diversity *in situ* is important to allow for natural processes such as adaptation to environmental change (Reusch et al. 2005; Sgrò et al. 2011; Smith et al. 2014). Further, while *ex situ* actions may help address one of the threats to genetic diversity frequently mentioned in National Reports (replacement of native varieties or breeds), they do not address two other major reported threats (habitat fragmentation and climate or environmental change). More analysis will be needed to explore linkages between actions and threats.

Despite their importance for conserving genetic diversity, genetic data (as indicators) and genetic monitoring (as an action) were mostly absent from the reports, even though genetic monitoring programs exist (e.g. trees across Europe: Aravanopoulos et al. 2015; Chinook salmon in California: Meek et al. 2016; European sturgeon in France: Roques et al. 2018; grey wolves in Switzerland: Dufresnes et al. 2019). These findings complement the observation by Pierson et al. (2016) that European countries rarely include genetic diversity data and monitoring in species recovery plans due to a lack of legislative requirements, as well as relatively limited input or involvement of geneticists (Taft et al. 2020). Also, assessing and reporting on change in genetic diversity typically requires standardized genetic monitoring across long-term (i.e., multi-decadal) time frames (Hoban et al. 2014; Le Cam et al. 2015; Mathieu-Bégné et al. 2019). Although such work is hindered by resources, capacity, funding cycles and strategic planning timeframes, it is vital- increased monitoring investment has the added benefit of increased competency and collaboration for managers and policy makers within and between countries. Overall, the limited number of long-term monitoring programs precludes our understanding of genetic diversity status and trends and undermines the goals of the CBD and other international commitments.

#### **Types of species**

References to genetic diversity in the CBD National Reports were biased towards certain categories of species. National Reports most commonly mentioned genetic diversity of cultivated crops and farm animals. Genetic diversity of crop wild relatives, forestry species, and species of conservation concern was discussed to a lesser degree, while there were few mentions of “other socio-economically important species” such as wild harvested species, species providing ecosystem services, and culturally valuable species. Trends in one

organismal group may be quite different from another (e.g. Outhwaite et al. 2020)- species groups for monitoring need to be discerned carefully using the best available scientific and local knowledge. There were limited mentions of genetic diversity in wild relatives of domesticated animals, possibly because the small number of domesticated animals means there are just  
525 fewer wild relatives. Our observations may reflect the relative emphasis of the Target 13 wording, as well as a focus on economic values. We support calls for the CBD to explicitly state the importance of maintaining genetic diversity of all species (Laikre et al. 2020), as agriculturally valuable species make up a small fraction of life on Earth (Recommendation 4).

### 530 **Change over time**

The relative *frequencies* in each category or response for all questions were not significantly different between 5<sup>th</sup> and 6<sup>th</sup> Reports. For example, reporting on “seed/tissue/gene banks” was the most frequent action in both Reports. This suggests that the focus and priorities of countries, regarding genetic diversity, have not shifted substantially over this four-year period (an  
535 admittedly short time for biodiversity). However, the total *number* of responses varied in some cases between 5<sup>th</sup> and 6<sup>th</sup> National Reports, e.g. the total numbers of actions identified.

First, the 6<sup>th</sup> Report contained significantly more mentions of genetic diversity topics under Targets not specifically focused on genetic diversity (i.e. Targets other than 13 and 16).  
540 Instructions did not ask countries to mention genetics with respect to other Targets in either report, so this increase may be attributable to increasing affordability of genetic tools and knowledge of genetic diversity, and to numerous calls for consideration of genetics in biodiversity policy (Pierson et al. 2016; Shafer et al. 2015; Taylor et al. 2017; Hoban et al. 2020; Laikre et al. 2020). Second, significantly more trends, values, and threats to genetic diversity  
545 were identified in 5<sup>th</sup> Reports (even though 6<sup>th</sup> Reports were longer). This could be because instructions for 5<sup>th</sup> National Reports provided more detail about these aspects (see [Supplemental Document B](#)). If this is true, it emphasizes strongly that the wording of CBD instructions (not just Targets) is extremely important for reporting (Recommendations 4, 6 and 7). An alternative explanation is decreased interest or expertise in genetic diversity in report  
550 writers over time.

We also note that Trends were reported less than half as often as Status- National Reports are seriously lacking in a clear temporal comparison of progress over time, as noted by (REF), further emphasizing a need for monitoring and reporting of genetic diversity (Recommendations  
555 5 and 7).

### **Caveats**

We acknowledge several methodological caveats. Although the CBD intended consistency for the 5<sup>th</sup> and 6<sup>th</sup> NRs to facilitate tracking progress (<https://www.cbd.int/reports/guidelines/>), the  
560 structure and format of the 6<sup>th</sup> NR are somewhat different. Therefore, in our study we focused on equivalent sections between the reports: status, threats, actions, obstacles, and progress towards the different biodiversity conservation targets (Supplemental Doc B). It is also very important to note that National Reports do not reflect all conservation actions or knowledge in a particular country, but are summaries of activities and progress, and might represent a country's

565 priorities, as well as data availability. Genetic research may be poorly understood or known by  
some government officers involved in CBD reporting, or some officers may lack sufficient  
access to data or genetics expertise when preparing the reports. This means that there may be  
discrepancies between reported progress and actions, and actual progress within countries (i.e.  
some countries may have achieved more or less than they reported, see Recommendation 7).  
570 However, at this stage there is no comparable global data set that could be used to track how  
countries assess their genetic diversity, and despite these caveats, we were able to analyse  
data provided in National Reports and discuss patterns and trends in reporting.

### **Recommendations/ Conclusions**

575 We close with recommendations for actions that may address issues we uncovered in our  
detailed survey of 114 National Reports. Our assessment suggests future improvements to the  
guidelines and format of National Reports, and to improved measures for assessing genetic  
diversity especially for the post-2020 CBD Biodiversity Framework.

580 Our results highlight that:

1. There is a need to increase awareness and knowledge of the essential role of genetic  
diversity in biodiversity, and of the benefits it brings to nature and people. Knowledge  
sharing should be encouraged through education, networking, and capacity building  
initiatives. Assessments of genetic diversity in agricultural and natural systems must be  
585 communicated to policy makers and conservation managers, and the effectiveness of  
such science-policy communication should be measured (e.g. Lundmark et al. 2019).
2. Better reporting on genetic diversity in wild species, including long-term monitoring to  
evaluate trends, is essential for effective biodiversity conservation. This must be practical  
for all countries, not simply those with highly-developed scientific infrastructure.  
590 Collaborations with geneticists would allow for guidance on cost-effective monitoring  
including sampling strategies and genetic markers.
3. There is a need for greater understanding of, and more reporting on, genetic diversity  
relating to traditional ecological knowledge. Databases and indicators for this area are  
needed.

595

We also discuss recommendations for CBD reporting, including NRs, post 2020. Signatory  
countries and the CBD Secretariat invest significant resources in designing, producing, and  
showcasing reports, so it is beneficial for reports to be informative to enable comparisons of  
progress over time.

4. Reporting on genetic diversity in ecologically and culturally important species, not just  
species associated with agriculture, is essential (Laikre et al 2020; Hoban et al 2020) to  
result in stable and resilient ecosystems. We recommend that the CBD requests  
discussion of targets, status, threats, and actions relating to genetic diversity in each  
category of species mentioned above (including culturally-important species, species  
605 providing ecosystem services, and species of conservation concern, Fig 3). This would  
increase the diversity of species represented in NRs.
5. We support recent suggestions to improve the CBD's 2020 zero draft genetic goals,  
action targets, and genetic diversity indicators including the measurement of effective



610 population size and changes to geographic range (Hoban et al. 2020; Laikre et al. 2020).  
Genetic diversity indicators must be easy to quantify but must also reliably reflect  
changes in genetic diversity and enable evaluation of actions taken to protect and  
restore genetic diversity.

615 6. We recommend that the CBD adopts improved and consistent terminology relating to  
genetic diversity and genetic methods. These should be communicated in the reporting  
instructions via glossaries, with examples, in all languages in which reports may be  
submitted (and more languages if possible). This should improve consistency in  
reporting, and awareness of genetics and its importance to conservation.

620 7. We suggest that amendments to the structure of NRs, and to their instructions, would  
provide greater guidance to countries on what to report and how, and would enable  
clearer comparisons of reporting on genetic diversity (and other metrics) among  
countries and over time. As one example, NR formatting could include lists of actions  
performed, or categories of species discussed, which can be “checked off” in the report.  
At the same time, to allow unstructured information, the CBD could encourage the  
inclusion of published reports and/or descriptions of case studies.

625  
Implementing these recommendations in future CBD National Reports should increase reporting  
of indicators, actions, and progress towards the protection of genetic diversity in all species, as  
well as consideration of genetic diversity in other targets. The gaps that we demonstrate are  
also an opportunity for CBD to facilitate capacity building and international collaboration, and  
630 equip countries to monitor genetic diversity post-2020.

635 Lastly, to ensure recognition and protection of the fundamental role that genetic diversity has in  
biodiversity, conservation geneticists and managers should be included among scientific experts  
consulted in policy making and reporting. Reciprocally, conservation geneticists need to actively  
present their expertise at the science-policy interface, in order to effectively preserve that part of  
biodiversity so often forgotten.

640

## References

- 645 1. Aguilar-Støen M, Dhillon SS. 2003. Implementation of the Convention on Biological  
Diversity in Mesoamerica: environmental and developmental perspectives.  
*Environmental Conservation* **30**: 131-138. <https://doi.org/10.1017/S0376892903000110>
- 650 2. Aravanopoulos FA, et al. 2015. Development of genetic monitoring methods for genetic  
conservation units of forest trees in Europe. European Forest Genetic Resources  
Programme (EUFORGEN), Bioversity International, Rome.
3. Bhandari HR, Bhanu AN, Srivastava K, Singh MN, Shreya HA. 2017. Assessment of  
genetic diversity in crop plants - an overview. *Advances in Plants & Agricultural  
Research* **7**: 279-286. <https://doi.org/10.15406/apar.2017.07.00255>

- 655 4. Bhatt R, Gill M, Hamilton H, Han X, Linden H, Young B. 2019. Uneven use of biodiversity indicators in fifth national reports to the Convention on Biological Diversity. Environmental Conservation 1-7. <https://doi.org/10.1017/S0376892919000365>
5. Bijlsma R, Loeschcke V. 2012. Genetic erosion impedes adaptive responses to stressful environments. Evolutionary Applications 5: 117-129. <https://doi.org/10.1111/j.1752-4571.2011.00214.x>
- 660 6. Birdlife International, Conservation International, The RSPB, The Nature Conservancy, WWF. 2016. Score Card - Convention of Biological Diversity: Progress Report towards The Aichi Biodiversity Targets, National commitments fall short of action needed to safeguard nature. [https://www.birdlife.org/sites/default/files/score\\_card\\_booklet\\_final.pdf](https://www.birdlife.org/sites/default/files/score_card_booklet_final.pdf) (accessed 18 August 2020).
- 665 7. Booy G, Hendriks RJJ, Smulders MJM, Groenendael JM, Vosman B. 2000. Genetic Diversity and the Survival of Populations. Plant Biology 2: 379-395. <https://doi.org/10.1055/s-2000-5958>
8. Bubb P. 2013. Scaling up or scaling down? Linking global and national biodiversity indicators and reporting. Pages 402-420 in Collen B, Pettorelli N, Baillie JEM, Durant SM, editors. Biodiversity Monitoring and Conservation: Bridging the Gap between Global Commitment and Local Action. John Wiley & Sons, Ltd, Chichester, UK.
- 670 9. Bubb P, Chenery A, Herkenrath P, Kapos V, Mapendembe A, Stanwell-Smith D, Walpole M. 2011. National indicators, monitoring and reporting for the strategic plan for biodiversity 2011-2020. A review of experience and recommendations in support of the CBD as hoc technical expert group (AHTEG) on indicators for the strategic plan 2011-2020. Project code CR 0495. A report by UNEP-WCMC with IUCN and ECNC for the UK Department for Environment Food and Rural Affairs (Defra). CBD report UNEP/CBD/AHTEG-SP-Ind/1/INF/2. <https://www.cbd.int/doc/meetings/ind/ahteg-sp-ind-01/information/ahteg-sp-ind-01-inf-02-en.pdf> (accessed 13 July 2020).
- 675 10. Casadebaig P, Trépos R, Picheny V, Langlade NB, Vincourt P, Debaeke P. 2014. Increased genetic diversity improves crop yield stability under climate variability: a computational study on sunflower. arXiv:1403.2825.
- 680 11. Castañeda-Álvarez NP, et al. 2016. Global conservation priorities for crop wild relatives. Nature Plants 2: 16022. <https://doi.org/10.1038/nplants.2016.22>
- 685 12. CBD. 2000. Sustaining Life on Earth. How the Convention on Biological Diversity promotes nature and human well-being. Secretariat of the Convention on Biological Diversity & the United Nations Environment Programme (UNEP), Montreal. <https://www.cbd.int/doc/publications/cbd-sustain-en.pdf> (accessed 10 July 2020).
- 690 13. CBD. 2004. Decision VII/30. Strategic Plan: future evaluation of progress. <https://www.cbd.int/doc/decisions/cop-07/cop-07-dec-30-en.pdf> (accessed 13 July 2020).
14. CBD. 2010a. Decision X/2. Strategic Plan for Biodiversity 2011-2020. Available from <https://www.cbd.int/doc/decisions/cop-10/cop-10-dec-02-en.pdf> (accessed 13 July 2020).
15. CBD. 2010b. Decision X/10. National reporting: review of experience and proposals for the fifth national report. <https://www.cbd.int/doc/decisions/cop-10/cop-10-dec-10-en.pdf> (accessed 13 July 2020).
- 695 16. CBD. 2010c. Indicators table. Generic and specific indicators for assessing progress in the attainment of the Aichi biodiversity targets, including and assessment of their main characteristics. Indicators table - Post SBSTTA 20-260716-CHM. <https://www.cbd.int/doc/strategic-plan/strategic-plan-indicators-en.pdf> (accessed 10 July 2020).
- 700 17. CBD. 2014. Global Biodiversity Outlook 4. Montréal. <https://www.cbd.int/gbo/gbo4/publication/gbo4-en.pdf> (accessed 13 July 2020).
18. CBD. 2016. Decision XIII/27. National reporting. <https://www.cbd.int/doc/decisions/cop->

- [13/cop-13-dec-27-en.pdf](#) (accessed 13 July 2020).
- 705 19. CBD. 2020
20. CBD Secretariat 2007. Submission from the Secretariat of the Convention on Biological Diversity on the Issue of Reducing Emissions from Deforestation in Developing Countries. Note by the Executive Secretary of the Convention on Biological Diversity. 22nd May 2007. [https://unfccc.int/sites/default/files/cbd\\_20070227134350.pdf](https://unfccc.int/sites/default/files/cbd_20070227134350.pdf)
- 710 21. Chandra A, Idrisova A. 2011. Convention on Biological Diversity: a review of national challenges and opportunities for implementation. *Biodiversity and Conservation* **20**: 3295-3316. <https://doi.org/10.1007/s10531-011-0141-x>
22. Coad L, et al. 2013. Progress towards the CBD protected area management effectiveness targets. *The International Journal for Protected Areas and Conservation* **19**: 13-24. <https://doi.org/10.2305/IUCN.CH.2013.PARKS-19-1.LC.en>
- 715 23. Di Falco S, Perrings C. 2003. Crop genetic diversity, productivity and stability of agroecosystems. A theoretical and empirical investigation. *Scottish Journal of Political Economy* **50**: 207-216.
24. Dufresnes C, Remollino N, Stoffel C, Manz R, Weber J-M, Fumagalli L. 2019. Two decades of non-invasive genetic monitoring of the grey wolves recolonizing the Alps support very limited dog introgression. *Scientific Reports* **9**: 148. <https://doi.org/10.1038/s41598-018-37331-x>
- 720 25. Ehlers A, Worm B, Reusch TBH. 2008. Importance of genetic diversity in eelgrass *Zostera marina* for its resilience to global warming. *Marine Ecology Progress Series* **355**: 1-7. <https://doi.org/10.3354/meps07369>
- 725 26. Esquinas-Alcázar J. 2005. Protecting crop genetic diversity for food security: political, ethical and technical challenges. *Nature Reviews Genetics* **6**: 946-953. <https://doi.org/10.1038/nrg1729>
27. FAO. 2009
- 730 28. Fant JB, Havens K, Kramer AT, Walsh SK, Callicrate T, Lacy RC, Maunder M, Meyer AH, Smith PP. 2016. What to do when we can't bank on seeds: What botanic gardens can learn from the zoo community about conserving plants in living collections. *American Journal of Botany* **103**: 1541-1543. <https://doi.org/10.3732/ajb.1600247>
29. Forest Europe. 2015. State of Europe's Forests 2015. Ministerial Conference on the Protection of Forests in Europe, Madrid, Spain. <https://www.foresteurope.org/docs/fullsoef2015.pdf>
- 735 30. Frankham R. 2005. Genetics and extinction. *Biological Conservation* **126**: 131-140. <https://doi.org/10.1016/j.biocon.2005.05.002>
31. Frankham R. 2010. Challenges and opportunities of genetic approaches to biological conservation. *Biological Conservation* **143**: 1919-1927. <https://doi.org/10.1016/j.biocon.2010.05.011>
- 740 32. Galli A, Wackernagel M, Iha K, Lazarus E. 2014. Ecological footprint: implications for biodiversity. *Biological Conservation* **173**: 121-132. <https://doi.org/10.1016/j.biocon.2013.10.019>
- 745 33. GmbH 2018. Gender Based Review of the Key National Biodiversity Related Strategies and Reports in South-East Europe. Deutsch Gesellschaft für Internationale Zusammenarbeit (GIZ) GmbH, Bonn and Eschborn, Germany. <https://balkangreenenergynews.com/wp-content/uploads/2018/07/Gender-Based-Review-of-the-NBSAP-and-CBD-in-SEE-countries-1.pdf>
- 750 34. Hoban S, Arntzen JA, Bruford MW, Godoy JA, Hoelzel AR, Segelbacher G, Vilà C, Bertorelle G. 2014. Comparative evaluation of potential indicators and temporal sampling protocols for monitoring genetic erosion. *Evolutionary Applications* **7**: 984-998. <https://doi.org/10.1111/eva.12197>

- 755 35. Hoban S. 2019. New guidance for *ex situ* gene conservation: Sampling realistic population systems and accounting for collection attrition. *Biological Conservation* **235**: 199-208. <https://doi.org/10.1016/j.biocon.2019.04.013>
36. Hoban S, et al. 2020. Genetic diversity targets and indicators in the CBD post-2020 global biodiversity framework must be improved. *Biological Conservation* **248**: 108654. <https://doi.org/10.1016/j.biocon.2020.108654>
- 760 37. Hoffmann I. 2010. Climate change and the characterization, breeding and conservation of animal genetic resources. *Animal Genetics* **41**: 32-46. <https://doi.org/10.1111/j.1365-2052.2010.02043.x>
38. Holderegger R, Balkenhol N, Bolliger J, Engler JO, Gugerli F, Hochkirch A, Nowak C, Segelbacher G, Widmer A, Zachos FE. 2019. Conservation genetics: Linking science and practice. *Conservation Biology* **28**: 3848-3855. <https://doi.org/10.1111/mec.15202>
- 765 39. Hollingsworth PM et al. 2020. Scotland's biodiversity progress to 2020 Aichi targets: conserving genetic diversity—development of a national approach for addressing Aichi Biodiversity Target 13 that includes wild species. Scottish Natural Heritage, Inverness, Scotland. <https://www.nature.scot/scotlands-biodiversity-progress-2020-aichi-targets-conserving-genetic-diversity-development-national> (accessed 14 August 2020)
- 770 40. Houston RD, et al. 2020. Harnessing genomics to fast-track genetic improvement in aquaculture. *Nature Review Genetics* **21**: 389-409. <https://doi.org/10.1038/s41576-020-0227-y>
- 775 41. Hughes AR, Inouye BD, Johnson MTJ, Underwood N, Vellend M. 2008. Ecological consequences of genetic diversity. *Ecology Letters* **11**: 609-623. <https://doi.org/10.1111/j.1461-0248.2008.01179.x>
42. IPBES, 2019. Global assessment report on biodiversity and ecosystem services of the Intergovernmental Science-Policy Platform on biodiversity and ecosystem services. Brondizio ES, Settele J, Díaz S, Ngo HT, editors. IPBES Secretariat, Bonn, Germany. <https://ipbes.net/global-assessment>
- 780 43. IUCN Global Gender Office (GGO). 2016. EGI Factsheet: Women and protected areas: Exploring gender in the Ramsar and World Heritage Conventions. Available from <https://genderandenvironment.org/resource/women-protected-areas-factsheet/> (accessed 13 July 2020).
- 785 44. Khoury CK, Bjorkman AD, Dempewolf H, Ramirez-Villegas J, Guarino L, Jarvis A, Rieseberg LH, Struik PC. 2014. Increasing homogeneity in global food supplies and the implications for food security. *Proceedings of the National Academy of Sciences* **111**: 4001-4006. <https://doi.org/10.1073/pnas.1313490111>
- 790 45. Khoury CK, et al. 2019. Comprehensiveness of conservation of useful wild plants: an operational indicator for biodiversity and sustainable development targets. *Ecological Indicators* **98**: 420-429. <https://doi.org/10.1016/j.ecolind.2018.11.016>
46. Laikre L. 2010. Genetic diversity is overlooked in international conservation policy implementation. *Conservation Genetics* **11**: 349-354. <https://doi.org/10.1007/s10592-009-0037-4>
- 795 47. Laikre L, Nilsson T, Pimmer CR, Ryman N, Allendorf FW. 2009. Importance of genetics in the interpretation of favourable conservation status. *Conservation Biology* **23**: 1378-1381. <https://doi.org/10.1111/j.1523-1739.2009.01360.x>
48. Laikre L, et al. 2010. Neglect of genetic diversity in implementation of the convention of biological diversity. *Conservation Biology* **24**: 86-88.
- 800 49. Laikre L, et al. 2020. Post-2020 goals overlook genetic diversity. *Science* **367**: 1083-1085. <https://doi.org/10.1126/science.abb2748>
50. Le Cam S, Perrier C, Besnard AL, Bernatchez L, Evanno G. 2015. Genetic and phenotypic changes in an Atlantic salmon population supplemented with non-local individuals: a longitudinal study over 21 years. *Proceedings of the Royal Society B*:

- 805 Biological Sciences **282**: 20142765. <https://doi.org/10.1098/rspb.2014.2765>
51. Leigh DM, Hendry AP, Vázquez-Domínguez E, Friesen VL. 2019. Estimated six per cent loss of genetic variation in wild populations since the industrial revolution. *Evolutionary Applications* **12**: 1505-1512. <https://doi.org/10.1111/eva.12810>
- 810 52. Lotze HK, Coll M, Magera AM, Ward-Paige C, Airoidi L. 2011. Recovery of marine animal populations and ecosystems. *Trends in Ecology and Evolution* **26**: 595-605. <https://doi.org/10.1016/j.tree.2011.07.008>
53. Lundmark C, Sandström A, Andersson K, Laikre L. 2019. Monitoring the effects of knowledge communication on conservation managers' perception of genetic biodiversity – A case study from the Baltic Sea. *Marine Policy* **99**: 223-229. <https://doi.org/10.1016/j.marpol.2018.10.023>
- 815 54. Mastretta-Yanes A, Acevedo Gasman F, Burgeff C, Cano Ramírez M, Piñero D, Sarukhán J. 2018. An initiative for the study and use of genetic diversity of domesticated plants and their wild relatives. *Frontiers in Plant Science* **9**: 209. <https://doi.org/10.3389/fpls.2018.00209>
- 820 55. Mathieu-Bégné E, Loot G, Chevalier M, Paz-Vinas I, Blanchet S. 2019. Demographic and genetic collapses in spatially structured populations: insights from a long-term survey in wild fish metapopulations. *Oikos* **128**: 196-207. <https://doi.org/10.1111/oik.05511>
- 825 56. Meek MH, [Baerwald MR](#), [Stephens MR](#), [Goodbla A](#), [Miller MR](#), [Tomalty KMH](#), [May B](#). 2016. Sequencing improves our ability to study threatened migratory species: Genetic population assignment in California's Central Valley Chinook salmon. *Ecology and Evolution* **6**: 7706-7716. <https://doi.org/10.1002/ece3.2493>.
- 830 57. Ministerial Conference on the Protection of Forests in Europe. 2015. Conference Proceedings of the 7th FOREST EUROPE Ministerial Conference and Forest Europe Extraordinary Ministerial Conference, Madrid 20-21 October 2015. [https://foresteurope.org/wp-content/uploads/2016/08/Forest\\_Europe\\_Madrid\\_proceedings.pdf](https://foresteurope.org/wp-content/uploads/2016/08/Forest_Europe_Madrid_proceedings.pdf) (accessed 13 July 2020).
- 835 58. Montréal Process. 2015. Criteria and indicators for the Conservation and Sustainable Management of Temperate and Boreal Forests. Technical notes on implementation of the Montreal Process criteria and indicators, Criteria 1-7, Fifth Edition, September 2015. <https://www.montrealprocess.org/documents/publications/techreports/MontrealProcessSeptember2015.pdf> (accessed 13 July 2020).
- 840 59. Nielsen L. 2011. Classifications of countries based on their level of development: How it is done and how it could be done. IMF Working Paper: Strategy, Policy, and Review Department. WP/11/31. <https://www.imf.org/en/Publications/WP/Issues/2016/12/31/Classifications-of-Countries-Based-on-their-Level-of-Development-How-it-is-Done-and-How-it-24628> (accessed 13 July 2020).
- 845 60. OECD (Organisation for Economic Co-operation and Development). 2019. The Post-2020 Biodiversity Framework: targets, indicators and measurability implications at global and national level. Interim Report, November 2019. <http://www.oecd.org/environment/resources/biodiversity/report-the-post-2020-biodiversity-framework-targets-indicators-and-measurability-implications-at-global-and-national-level.pdf> (accessed 13 July 2020).
- 850 61. Paton A, Lughada EN. 2011. The irresistible target meets the unachievable objective: what have 8 years of GSPC implementation taught us about target setting and achievable objectives? *Botanical Journal of the Linnean Society* **166**: 250-260. <https://doi.org/10.1111/j.1095-8339.2011.01155.x>
- 855 62. Pérez-Espona S, ConGRESS Consortium. 2017. Conservation genetics in the European

- Union - biases, gaps and future directions. *Biological Conservation* **209**: 130-136.  
<https://doi.org/10.1016/j.biocon.2017.01.020>
- 860 63. Pierson JC, Coates DJ, Oostermeijer JGB, Beissinger SR, Bragg JG, Sunnucks P, Schumaker NH, Young AG. 2016. Consideration of genetic factors in threatened species recovery plans on three continents. *Frontiers in Ecology and the Environment* **14**: 433-440. <https://doi.org/10.1002/fee.1323>.
- 865 64. Potter KM, Jetton RM, Bower A, Jacobs DF, Man G, Hipkins VD, Westwood M. 2017. Banking on the future: progress, challenges and opportunities for the genetic conservation of forest trees. *New Forests* **48**: 153-180. <https://doi.org/10.1007/s11056-017-9582-8>
65. Prieto I, Violle C, Barre P, Durand JL, Ghesquiere M, Litrico I. 2015 Complementary effects of species and genetic diversity on productivity and stability of sown grasslands. *Nature Plants* **1**: 15033. <https://doi.org/10.1038/nplants.2015.33>
- 870 66. Raffard A, Santoul F, Cucherousset J, Blanchet S. 2019. The community and ecosystem consequences of intraspecific diversity: a meta-analysis. *Biological Reviews* **94**: 648-661. <https://doi.org/10.1111/brv.12472>
67. Ramirez-Gomez et al. 2017
- 875 68. Reusch TBH, Ehlers A, Hammerli A, Worm B. 2005. Ecosystem recovery after climatic extremes enhanced by genotypic diversity. *Proceedings of the National Academy of Sciences* **102**: 2826-2831. <https://doi.org/10.1073/pnas.0500008102>
69. Roques S, Berrebi P, Rochard E, Acolas ML. 2018. Genetic monitoring for the successful re-stocking of a critically endangered diadromous fish with low diversity. *Biological Conservation* **221**: 91-102. <https://doi.org/10.1016/j.biocon.2018.02.032>
- 880 70. Santamaría L, Mendez PF. 2012. Evolution in biodiversity policy - current gaps and future needs. *Evolutionary Applications* **5**: 202-218. <https://doi.org/10.1111/j.1752-4571.2011.00229.x>
- 885 71. SCB. 2020. Society for Conservation Biology Position Paper on The Convention on Biological Diversity's Zero Draft (of January 6, 2020) of the Post-2020 Global Biodiversity Framework <https://conbio.org/policy/scb-position-on-post-2020-global-biodiversity-framework>. Accessed on Aug. 8, 2020.
72. Sgrò CM, Lowe AJ, Hoffmann AA. 2011. Building evolutionary resilience for conserving biodiversity under climate change. *Evolutionary Applications* **4**: 326-337. <https://doi.org/10.1111/j.1752-4571.2010.00157.x>
- 890 73. Shafer ABA, et al. 2015. Genomics and the challenging translation into conservation practice. *Trends in Ecology and Evolution* **30**: 78-87. <https://doi.org/10.1016/j.tree.2014.11.009>
74. Sjöqvist CO, Kremp A. 2016. Genetic diversity affects ecological performance and stress response of marine diatom populations. *The ISME Journal* **10**: 2755–2766. <https://doi.org/10.1038/ismej.2016.44>.
- 895 75. Smith TB, Kinnison MT, Strauss SY, Fuller TL, Carroll SP. 2014. Prescriptive evolution to conserve and manage biodiversity. *Annual Review of Ecology, Evolution, and Systematics* **45**: 1-22. <https://doi.org/10.1146/annurev-ecolsys-120213-091747>
- 900 76. Spielman D, Brook B, Frankham R. 2004. Most species are not driven to extinction before genetic factors impact them. *Proceedings of the National Academy of Sciences USA* **101**: 15261-15264. <https://doi.org/10.1073/pnas.0403809101>
77. Taft HR, McCoskey DN, Miller JM, Pearson SK, Coleman MA, Fletcher NK, Mittan CS, Meek MH, Barbosa S. 2020. Research–management partnerships: An opportunity to integrate genetics in conservation actions. *Conservation Science and Practice*. <https://doi.org/10.1111/csp2.218>
- 905 78. Talaat, et al. 2012

79. Taylor HR, Dussex N, Van Heezik Y. 2017. Bridging the conservation genetics gap by identifying barriers to implementation for conservation practitioners. *Global Ecology and Conservation* **10**: 231-242. <https://doi.org/10.1016/j.gecco.2017.04.001>
- 910 80. Taylor BL, Vojta CD, Waller DM, Waples RS. 2020. Neglect of genetic diversity in implementation of the convention of biological diversity. *Conservation Biology* **24**: 86-88. <https://doi.org/10.1111/j.1523-1739.2009.01425.x>
81. Tyrrel TD, Vié J-C, Zimsky M. 2009. Tracking progress toward the 2010 biodiversity target and beyond. *Science* **325**: 1503-1504. DOI: 10.1126/science.1175466
- 915 82. Vanhove M P M, Rochette A-J, Janssens de Bisthoven L. 2017. Joining science and policy in capacity development for monitoring progress towards the Aichi biodiversity targets in the global South. *Ecological Indicators* **73**: 694–697. <https://doi.org/10.1016/j.ecolind.2016.10.028>
83. Vernesi C, Bruford MW, Bertorelle G, Pecchioli E, Rizzoli A, Hauffe HC. 2008. Where's the conservation in conservation genetics? *Conservation Biology* **22**: 802-804. <https://doi.org/10.1111/j.1523-1739.2008.00911.x>
- 920 84. Walpole M, et al. 2009. Tracking Progress Toward the 2010 biodiversity target and Beyond. *Science* **325**: 1503-1504. <https://doi.org/10.1126/science.1175466>
85. Wernberg T, Coleman MA, Bennett S, Thomsen MS, Tuya F, Kelaher BP. 2018. Genetic diversity and kelp forest vulnerability to climatic stress. *Scientific Reports* **8**: 1851. <https://doi.org/10.1038/s41598-018-20009-9>
- 925 86. Wilson EO. 1985. The biological diversity crisis: A challenge to Science. *Issues in Science and Technology* **2**: 20-29. <https://www.jstor.org/stable/43310356>
87. Wilson EO, Peter FM, editors. 1988. *Biodiversity*. National Academy Press, Washington DC.
- 930 88. Woodley S, Bertzky B, Crawhall N, Dudley N, Londoño JM, MacKinnon K, Redford K, Sandwith T. 2012. Meeting Aichi target 11: What does success look like for protected area systems? *The International Journal for Protected Areas and Conservation* **18**: 23-36. [https://www.iucn.org/sites/dev/files/import/downloads/parks\\_woodley.pdf](https://www.iucn.org/sites/dev/files/import/downloads/parks_woodley.pdf)

935

## Glossary

- Action – an activity undertaken (or planned to be undertaken) by a country to make progress towards one or more targets, for example: development of policy; management intervention; training; implementation of a conservation program
- 940 • Aichi targets – a set of 20 targets agreed by the CBD to be achieved by 2020
- CBD – The Convention on Biological Diversity
- Genetic diversity – inherited genetic and trait differences among individuals and populations within a species
- 945 • Genetic erosion – a loss of genetic diversity
- Genetic resource – refers to genetic material of actual or potential value. Genetic material is any material of plant, animal, microbial or other origin containing functional units of heredity (CBD, Art 2). Animals, plants, micro-organisms and invertebrates which are used for Food, Agriculture and Forestry are called Genetic Resources. Together with the components
- 950 which fulfill agri-ecological functions they are grouped under the concept Agrobiodiversity.
- GSPC – Global Strategy for Plant Conservation
- Indicator – a measure used to present a high level summary of biodiversity; we include in our questionnaire both “official” CBD indicators (REF) and other indicators

- National Reports – reports submitted by signatories (countries) to the CBD every 4 years
- 955 to outline progress towards CBD and national targets: 5th Reports were submitted in 2014 and 6th Reports were submitted in 2018
- National targets - targets that each country sets for themselves: a national-level interpretation of the 20 CBD Aichi targets
  - Progress – an assessment of whether a country considers itself as on track to meet a
- 960 CBD or national target, for example: “on track to achieve”; “some progress but insufficient”; “moving away”
- SDG – Sustainable Development Goals
  - Status – a measure of genetic diversity (or more frequently a proxy assumed to relate to it) at a single time point, e.g., the number of seeds in a seed bank at a given point in time.
- 965
- Target -
  - Threat – a process or driver of change that is, or has potential to be, detrimental to genetic diversity
  - Trend – a measure of change in status over a period of time, i.e. an observation that status has increased, decreased, or has not changed.
- 970
- Value – a perceived utility or benefit obtained from genetic diversity
